# Supplementary material
Source: HighWire-hosted journal article supplement (https://bmjopenquality.bmj.com/highwire/filestream/145461/field_highwire_adjunct_files/0/bmjoq-2022-002213supp001_data_supplement.pdf)

Supplemental Figure 1

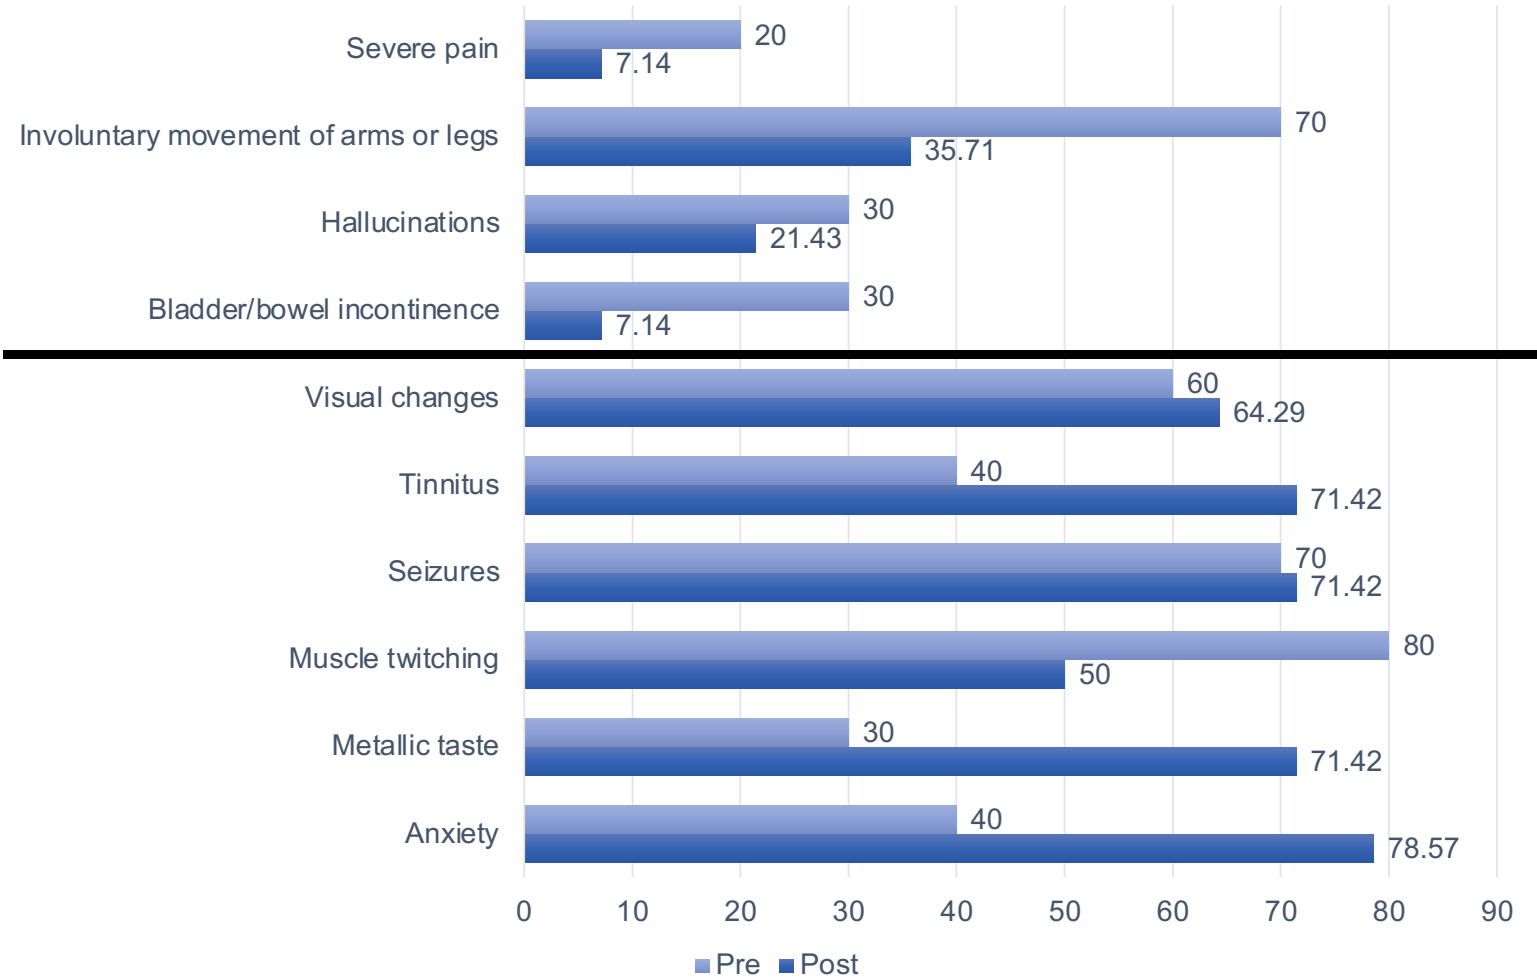

Supplemental Figure 2

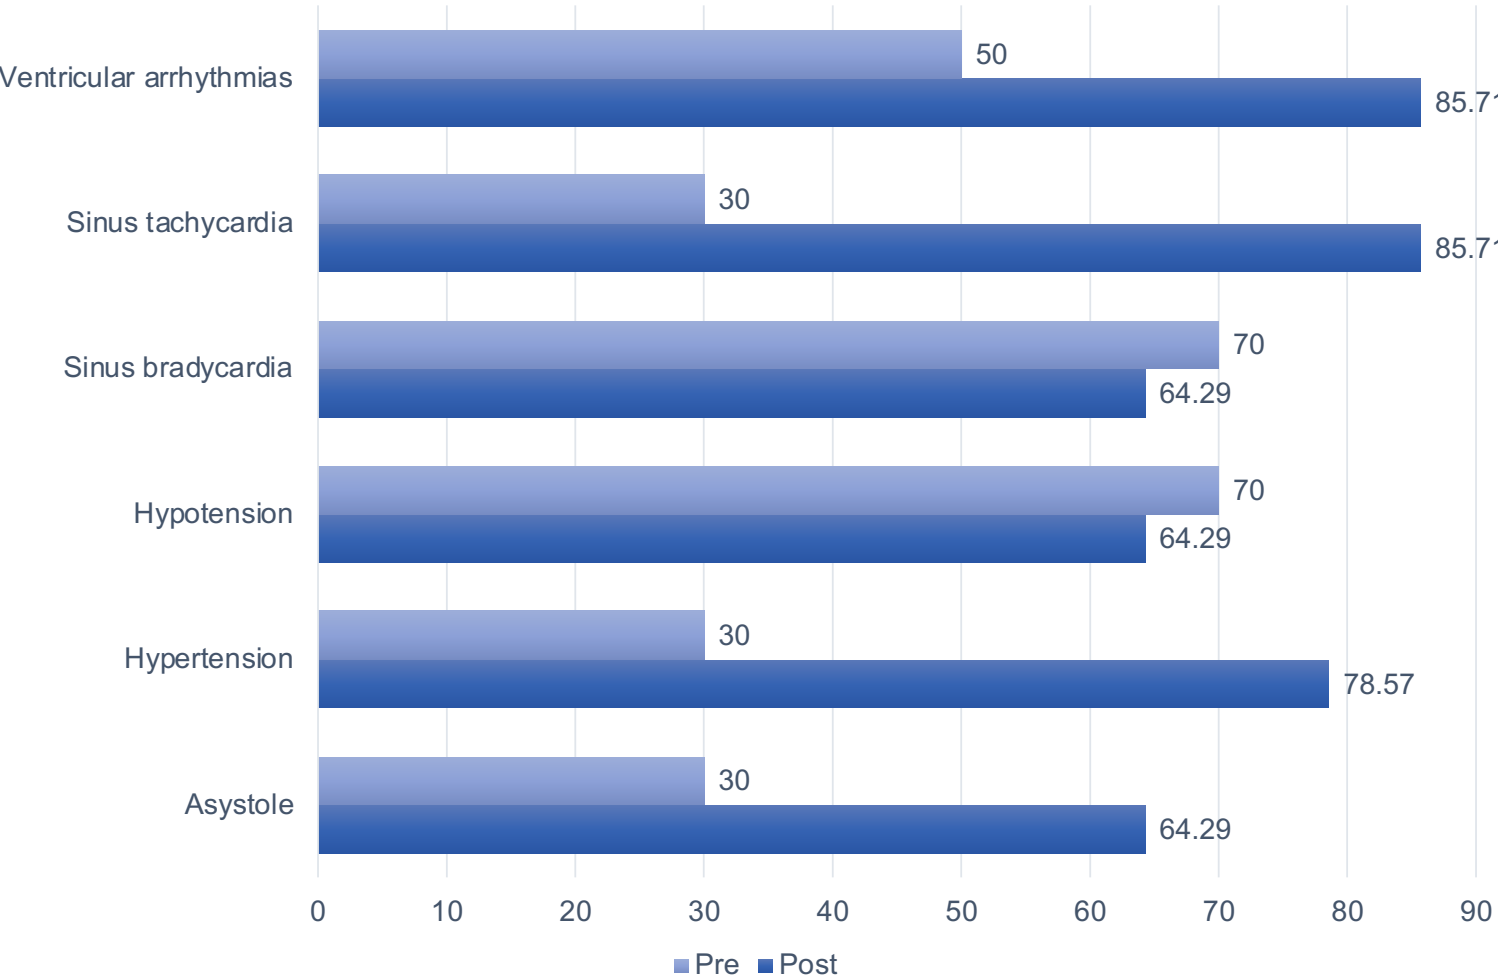

Supplemental Figure 3

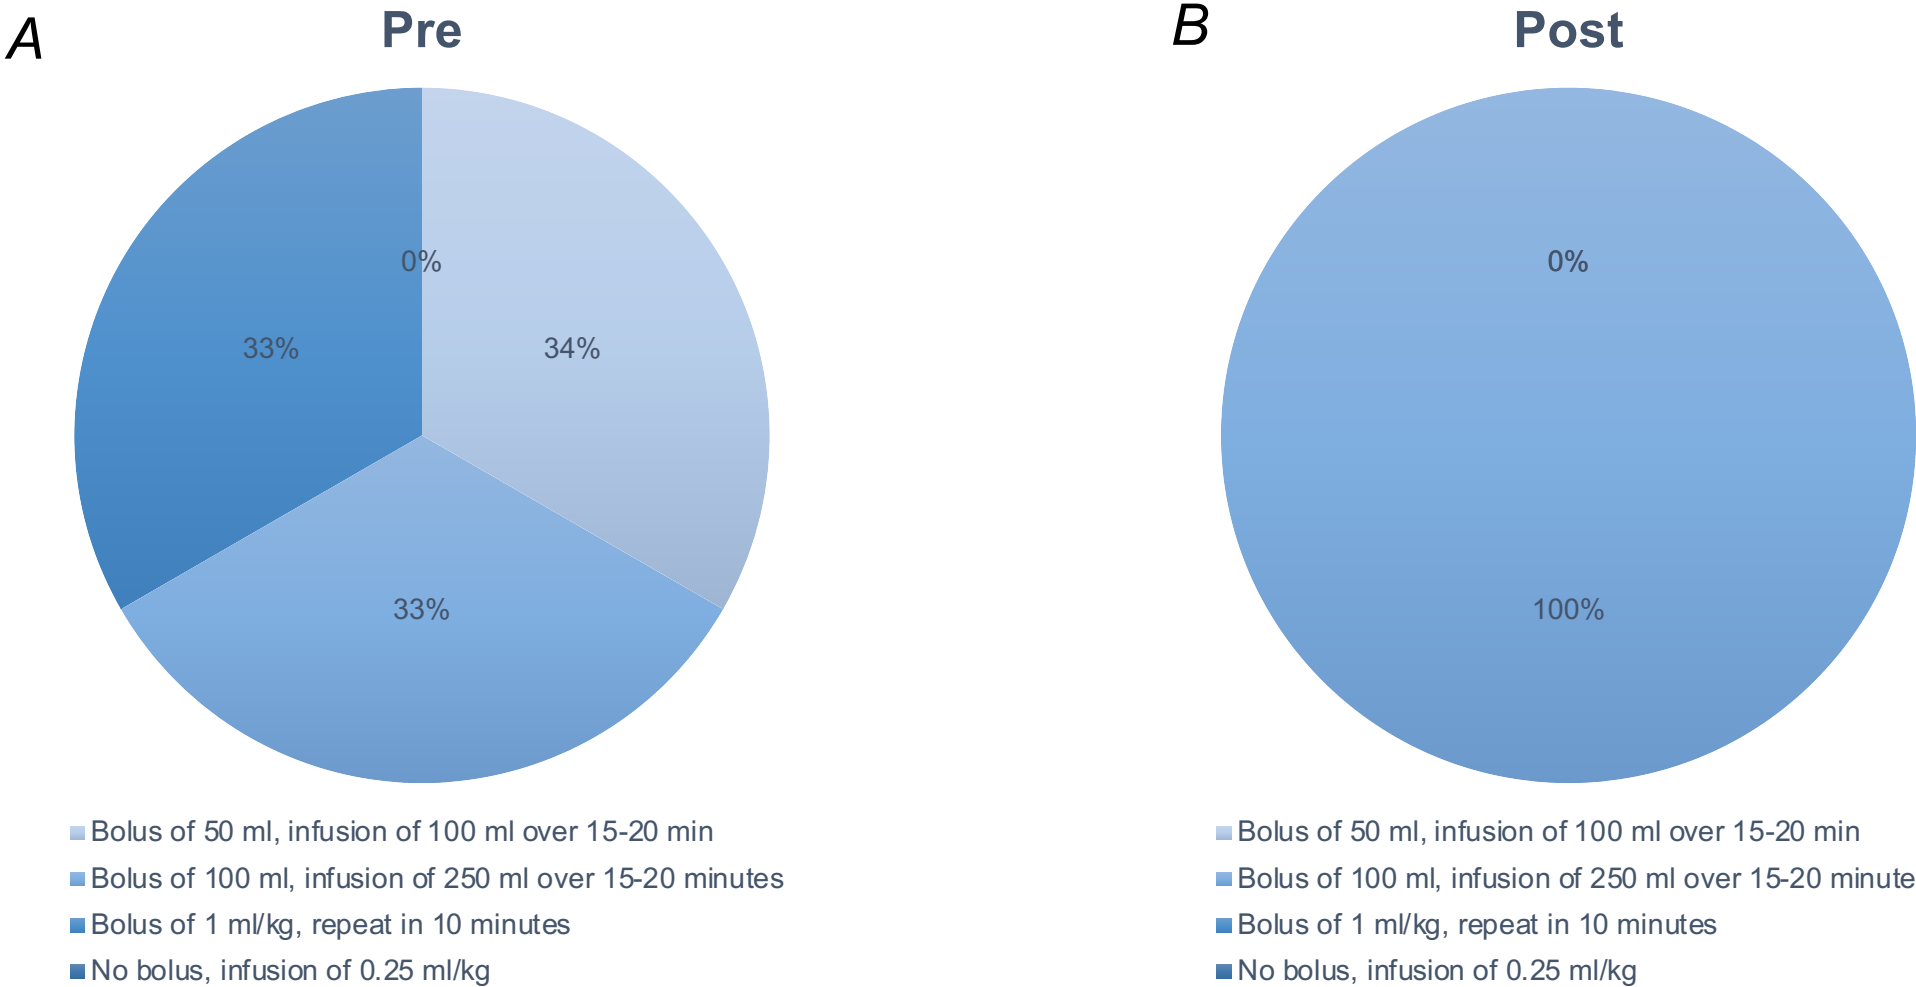

Supplemental Figure 4

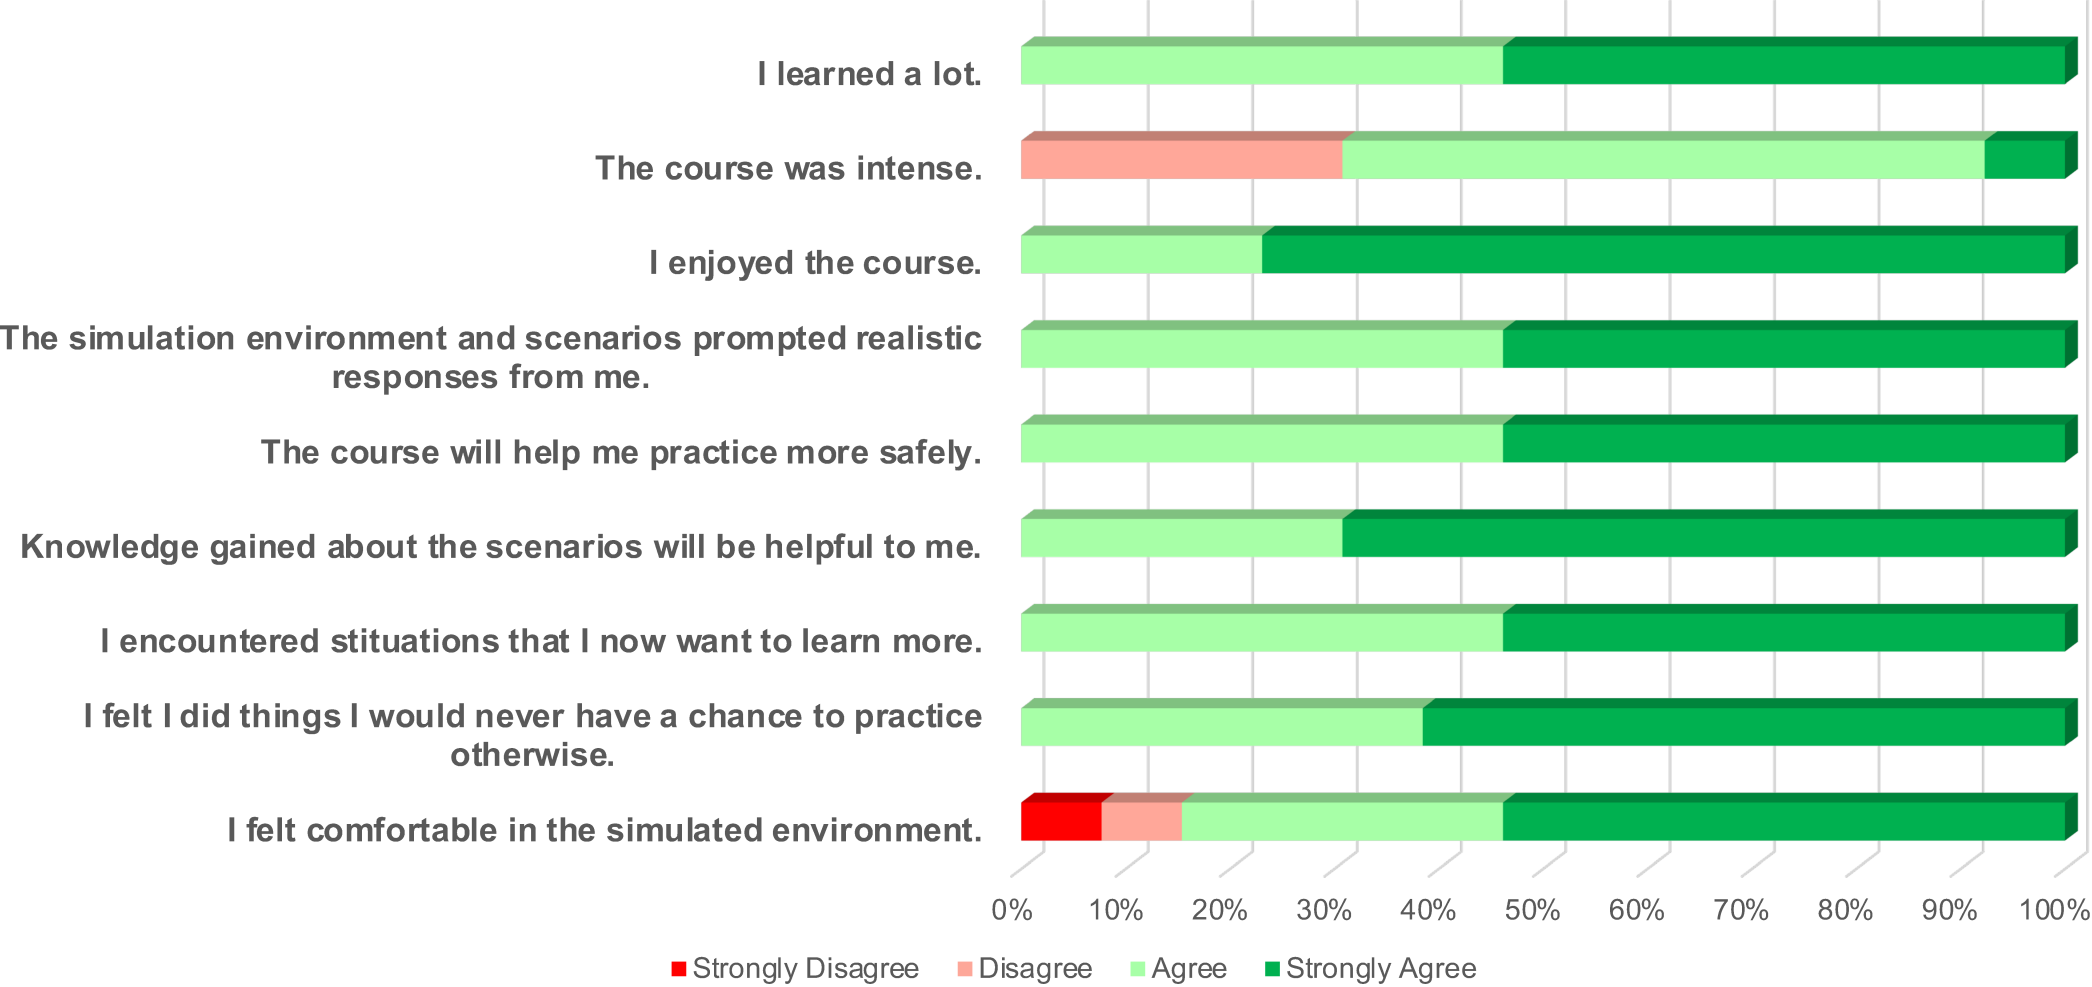

# Supplemental Figure 5

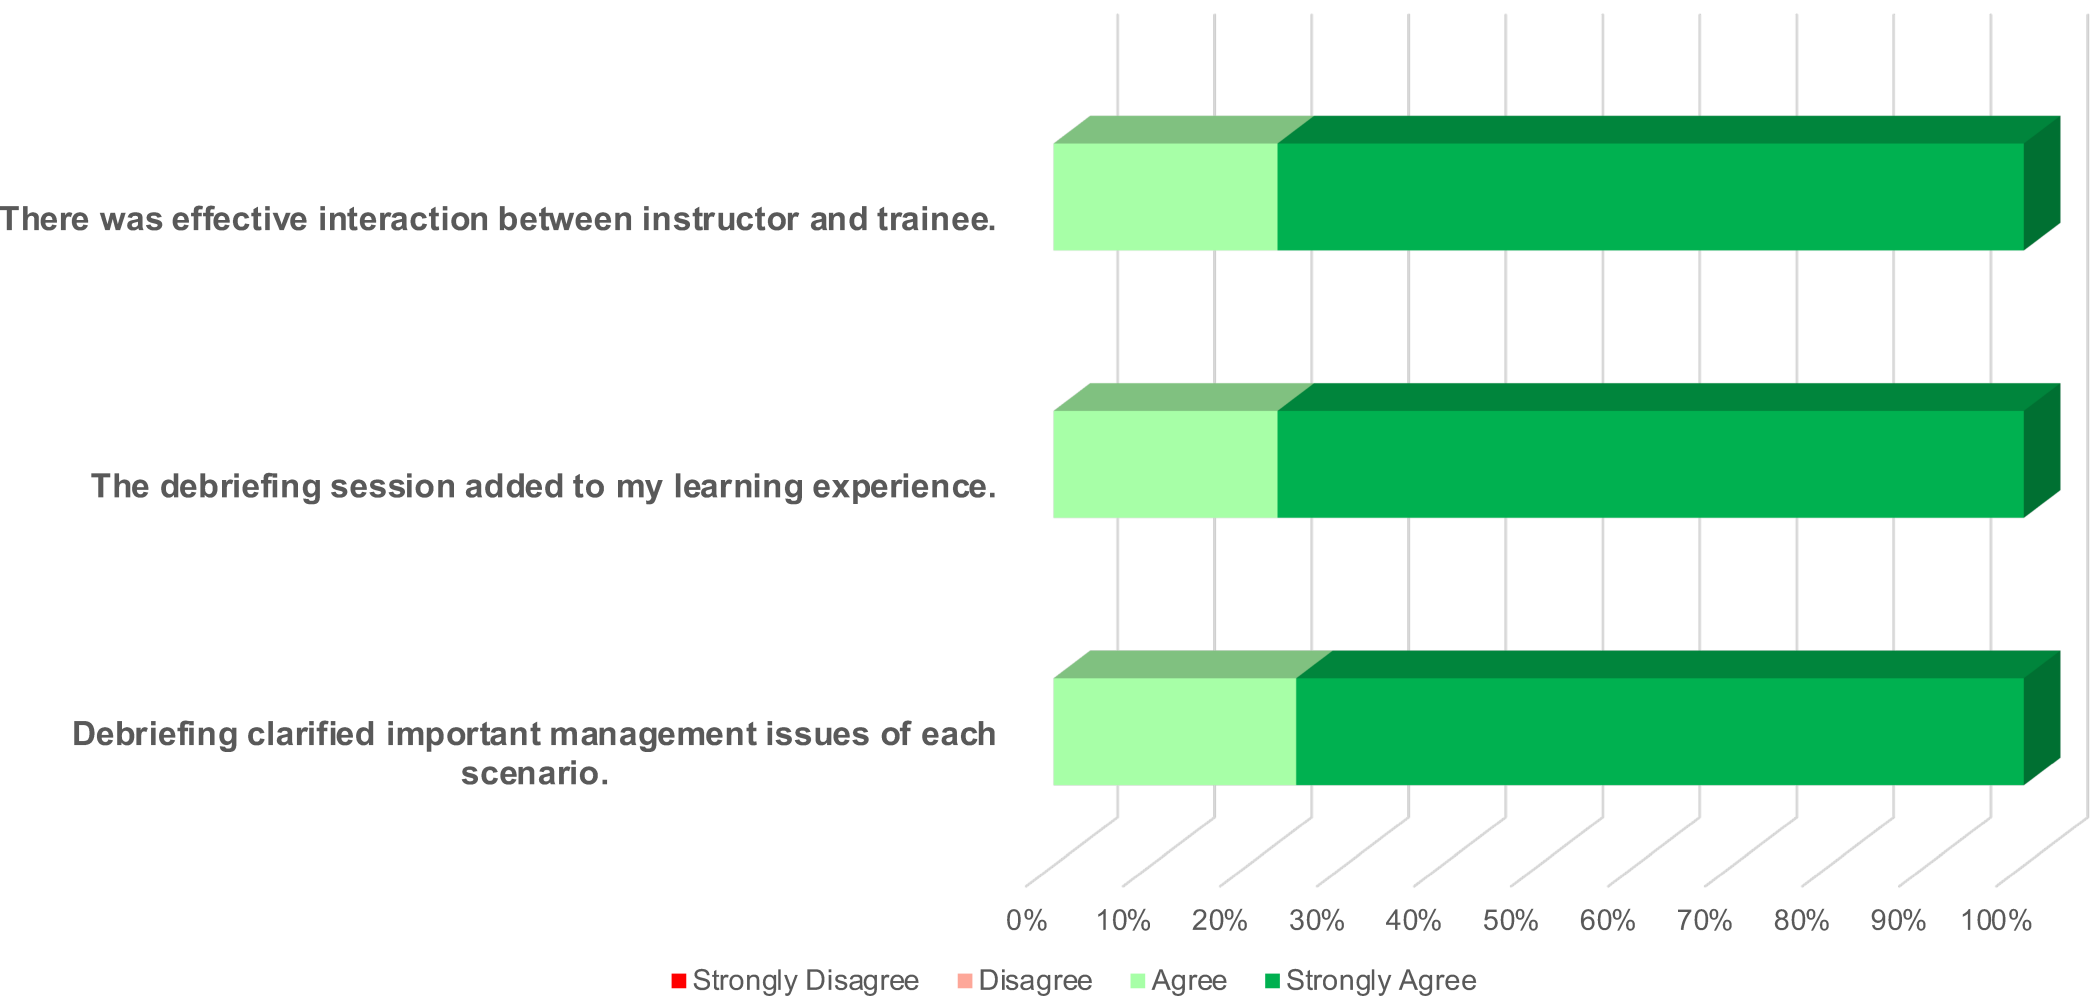

Supplement: bmjoq-2022-002213supp001_data_supplement.pdf [file bmjoq-2022-002213supp001_data_supplement.pdf]
